# Supplementary material for: Assessment of systemic and gastrointestinal tissue damage biomarkers for GVHD risk stratification
Source: PubMed Central journal article supplement — Blood Adv. 2022 Jun 23;6(12):3707–15. doi: 10.1182/bloodadvances.2022007296 (PMC9631548; doi:10.1182/bloodadvances.2022007296), 2022-06-23
Supplement: advancesADV2022007296-suppl1.pdf [file advancesADV2022007296-suppl1.pdf]

## Supplemental Appendix:

### Assessment of Systemic and Gastrointestinal Tissue Damage Biomarkers for GVHD Risk Stratification

#### Supplemental Tables:

|                                                                                                                                         |   |
|-----------------------------------------------------------------------------------------------------------------------------------------|---|
| <b>Table S1:</b> Patient distribution by center.                                                                                        | 2 |
| <b>Table S2:</b> AICs for each algorithm in the training cohort.                                                                        | 3 |
| <b>Table S3:</b> TNFR1+TIM3 algorithm and threshold performance.                                                                        | 4 |
| <b>Table S4:</b> TNFR1+ST2 algorithm and threshold performance.                                                                         | 4 |
| <b>Table S5:</b> TNFR1+REG3 $\alpha$ algorithm and threshold performance.                                                               | 4 |
| <b>Table S6:</b> ST2+REG3 $\alpha$ algorithm and threshold performance.                                                                 | 4 |
| <b>Table S7:</b> AUC of the ROC curves for individual biomarker algorithms in the validation cohort                                     | 5 |
| <b>Table S8:</b> Performance of two biomarker algorithms using the thresholds that provide sensitivity closest to 0.8                   | 5 |
| <b>Table S9:</b> Performance of two biomarker algorithms using the thresholds that provide specificity closest to 0.8                   | 5 |
| <b>Table S10:</b> ST2+REG3 $\alpha$ algorithm performance characteristics in patients presenting with LGI $\pm$ other or skin only GVHD | 5 |

#### Supplemental Figures:

|                                                                                                                                                                  |   |
|------------------------------------------------------------------------------------------------------------------------------------------------------------------|---|
| <b>Figure S1:</b> 12 month NRM for risk groups defined by two biomarker algorithms                                                                               | 6 |
| <b>Figure S2:</b> GVHD outcomes in risk groups defined by two biomarker algorithms.                                                                              | 7 |
| <b>Figure S3:</b> Cumulative incidence of relapse in risk groups defined by two biomarker algorithms.                                                            | 8 |
| <b>Figure S4:</b> 6 month NRM for risk groups defined by two biomarker algorithms in patients who received post-transplant cyclophosphamide as GVHD prophylaxis. | 9 |

**Table S1: Patient distribution by center**

|                                               | Training (n=352) | Validation (n=378) |
|-----------------------------------------------|------------------|--------------------|
| Bambino Gesu Children's Hospital              | 0                | 18                 |
| Children's Hospital of Los Angeles            | 0                | 7                  |
| City of Hope Comprehensive Cancer Center      | 0                | 11                 |
| Columbia University Medical Center            | 0                | 5                  |
| Emory University                              | 4                | 18                 |
| Hospital for Sick Children                    | 0                | 1                  |
| Icahn School of Medicine at Mount Sinai       | 17               | 34                 |
| King Chulalongkorn Memorial Hospital          | 7                | 2                  |
| Mayo Clinic                                   | 21               | 23                 |
| Massachusetts General Hospital                | 0                | 36                 |
| Ohio State University                         | 22               | 57                 |
| University Hospital Carl Gustav Carus Dresden | 9                | 1                  |
| University of Erlangen                        | 0                | 31                 |
| University of Hamburg                         | 41               | 39                 |
| University of Michigan                        | 178              | 4                  |
| University of Pennsylvania                    | 11               | 22                 |
| University of Regensburg                      | 32               | 36                 |
| University of Würzburg                        | 10               | 11                 |
| Vanderbilt University                         | 0                | 22                 |
| <b>Total</b>                                  | <b>352</b>       | <b>378</b>         |

**Table S2: AICs for each algorithm in the training cohort.**

| 1 Biomarker | AIC   | 2 Biomarker | AIC          | 3 Biomarker | AIC          | 4 Biomarker | AIC          |
|-------------|-------|-------------|--------------|-------------|--------------|-------------|--------------|
| ST2         | 807.7 | + REG3      | 792.2        | + TNFR1     | <b>792.5</b> | + TIM3      | <b>793.0</b> |
|             |       |             |              | + TIM3      | <b>793.9</b> |             |              |
|             |       | + TNFR1     | 803.3        | + TIM3      | <b>803.5</b> |             |              |
|             |       | + TIM3      | <b>809.7</b> |             |              |             |              |
| REG3        | 799.8 | + TNFR1     | 795.8        | + TIM3      | <b>796.8</b> |             |              |
|             |       | + TIM3      | <b>801.8</b> |             |              |             |              |
| TNFR1       | 809.7 | + TIM3      | 810.3        |             |              |             |              |
| TIM3        | 829.3 |             |              |             |              |             |              |

The first column contains algorithms of single biomarkers. Additional biomarkers are added sequentially in each cell to the right.

**Table S3: TNFR1+TIM3 algorithm and threshold performance.**

Algorithm\*:  $\log[-\log(1 - \hat{p})] = -9.266 + 2.470 \log_{10} \text{TNFR1} - 0.375 \log_{10} \text{TIM3}$

| Threshold   | Sensitivity | Specificity | Product      |
|-------------|-------------|-------------|--------------|
| 0.19        | 0.65        | 0.60        | 0.390        |
| 0.2         | 0.63        | 0.65        | 0.410        |
| <b>0.21</b> | <b>0.60</b> | <b>0.70</b> | <b>0.420</b> |
| 0.22        | 0.56        | 0.72        | 0.403        |
| 0.23        | 0.53        | 0.75        | 0.398        |

**Table S4: TNFR1+ST2 algorithm and threshold performance.**

Algorithm\*:  $\log[-\log(1 - \hat{p})] = -11.287 + 1.062 \log_{10} \text{ST2} + 1.329 \log_{10} \text{TNFR1}$

| Threshold   | Sensitivity | Specificity | Product      |
|-------------|-------------|-------------|--------------|
| 0.2         | 0.74        | 0.64        | 0.474        |
| 0.21        | 0.72        | 0.66        | 0.475        |
| <b>0.22</b> | <b>0.68</b> | <b>0.70</b> | <b>0.476</b> |
| 0.23        | 0.65        | 0.72        | 0.468        |
| 0.24        | 0.63        | 0.75        | 0.473        |

**Table S5: TNFR1+REG3 $\alpha$  algorithm and threshold performance.**

Algorithm\*:  $\log[-\log(1 - \hat{p})] = -7.543 + 1.218 \log_{10} \text{TNFR1} + 0.884 \log_{10} \text{REG3}\alpha$

| Threshold   | Sensitivity | Specificity | Product      |
|-------------|-------------|-------------|--------------|
| 0.14        | 0.88        | 0.45        | 0.396        |
| 0.15        | 0.82        | 0.52        | 0.426        |
| <b>0.16</b> | <b>0.81</b> | <b>0.57</b> | <b>0.462</b> |
| 0.17        | 0.74        | 0.60        | 0.444        |
| 0.18        | 0.67        | 0.64        | 0.429        |

**Table S6: ST2+REG3 $\alpha$  algorithm and threshold performance.**

Algorithm\*:  $\log[-\log(1 - \hat{p})] = -7.823 + 1.027 \log_{10} \text{ST2} + 0.875 \log_{10} \text{REG3}\alpha$

| Threshold   | Sensitivity | Specificity | Product      |
|-------------|-------------|-------------|--------------|
| 0.19        | 0.68        | 0.66        | 0.449        |
| 0.2         | 0.68        | 0.68        | 0.462        |
| <b>0.21</b> | <b>0.65</b> | <b>0.72</b> | <b>0.468</b> |
| 0.22        | 0.63        | 0.72        | 0.454        |
| 0.23        | 0.61        | 0.74        | 0.451        |

\*  $\hat{p}$  = estimated predicted probability of six month NRM

**Table S7: AUC of the ROC curves for individual biomarker algorithms in the validation cohort.**

| Biomarker     | AUC  |
|---------------|------|
| TNFR1         | 0.58 |
| TIM3          | 0.56 |
| IL6           | 0.55 |
| ST2           | 0.73 |
| REG3 $\alpha$ | 0.75 |

**Table S8: Performance of two biomarker algorithms using the thresholds that provide sensitivity closest to 0.8**

| Algorithm           | Threshold | Sensitivity | Specificity | PPV  | NPV  |
|---------------------|-----------|-------------|-------------|------|------|
| TNFR1+TIM3          | 0.13      | <b>0.82</b> | 0.24        | 0.15 | 0.89 |
| TNFR1+ST2           | 0.12      | <b>0.82</b> | 0.34        | 0.17 | 0.92 |
| TNFR1+REG3 $\alpha$ | 0.17      | <b>0.80</b> | 0.53        | 0.22 | 0.94 |
| ST2+REG3 $\alpha$   | 0.15      | <b>0.84</b> | 0.59        | 0.26 | 0.96 |

**Table S9: Performance of two biomarker algorithms using the thresholds that provide specificity closest to 0.8**

| Algorithm           | Threshold | Sensitivity | Specificity | PPV  | NPV  |
|---------------------|-----------|-------------|-------------|------|------|
| TNFR1+TIM3          | 0.26      | 0.33        | <b>0.81</b> | 0.23 | 0.88 |
| TNFR1+ST2           | 0.22      | 0.55        | <b>0.80</b> | 0.31 | 0.91 |
| TNFR1+REG3 $\alpha$ | 0.28      | 0.47        | <b>0.80</b> | 0.29 | 0.9  |
| ST2+REG3 $\alpha$   | 0.24      | 0.67        | <b>0.82</b> | 0.39 | 0.94 |

**Table S10: ST2+REG3 $\alpha$  algorithm performance characteristics in patients presenting with LGI  $\pm$  other or skin only GVHD**

|                 | Sensitivity | Specificity | PPV  | NPV  |
|-----------------|-------------|-------------|------|------|
| LGI $\pm$ other | 0.93        | 0.61        | 0.48 | 0.96 |
| Skin only       | 0.47        | 0.81        | 0.17 | 0.95 |

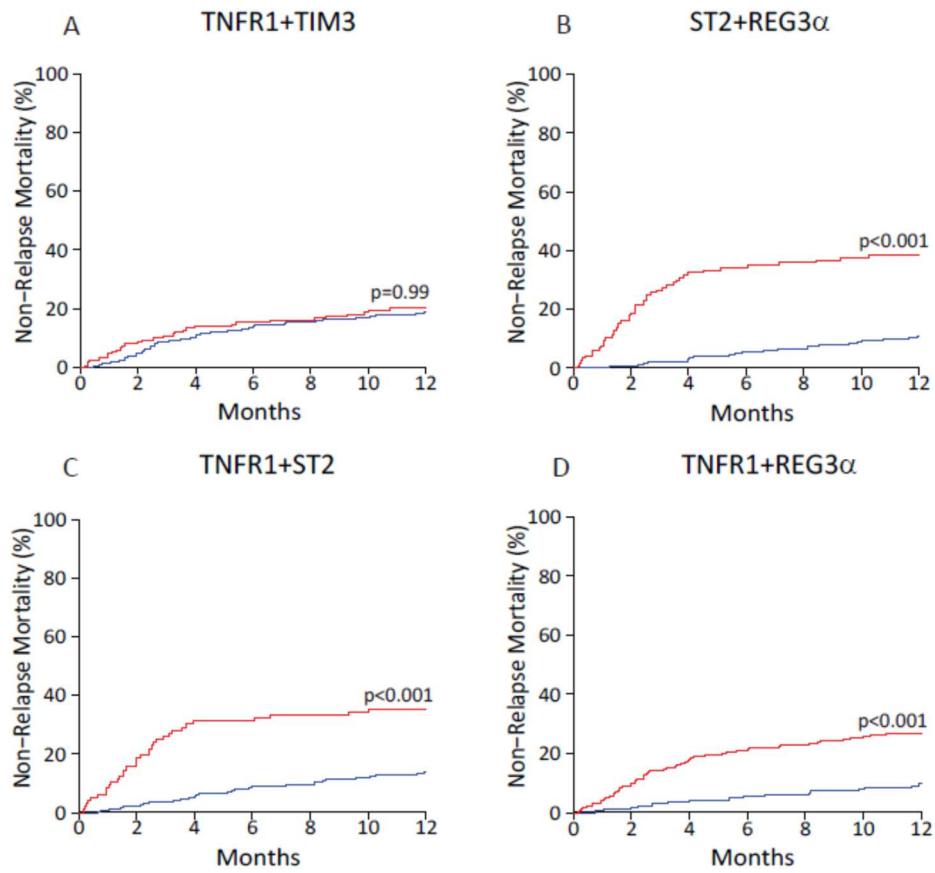

**Figure S1: 12 month NRM for risk groups defined by two biomarker algorithms.** The cumulative incidence of 12 month NRM is shown for high (red) and low (blue) risk patients (A) TNFR1+TIM3 (20% vs 19%,  $p=0.99$ ); (B) ST2+REG3 $\alpha$  (38% vs 11%,  $p<0.001$ ); (C) TNFR1+ST2 (35% vs 14%,  $P<0.001$ ); and (D) TNFR1+REG3 $\alpha$  (27% vs 10%,  $p<0.001$ ).

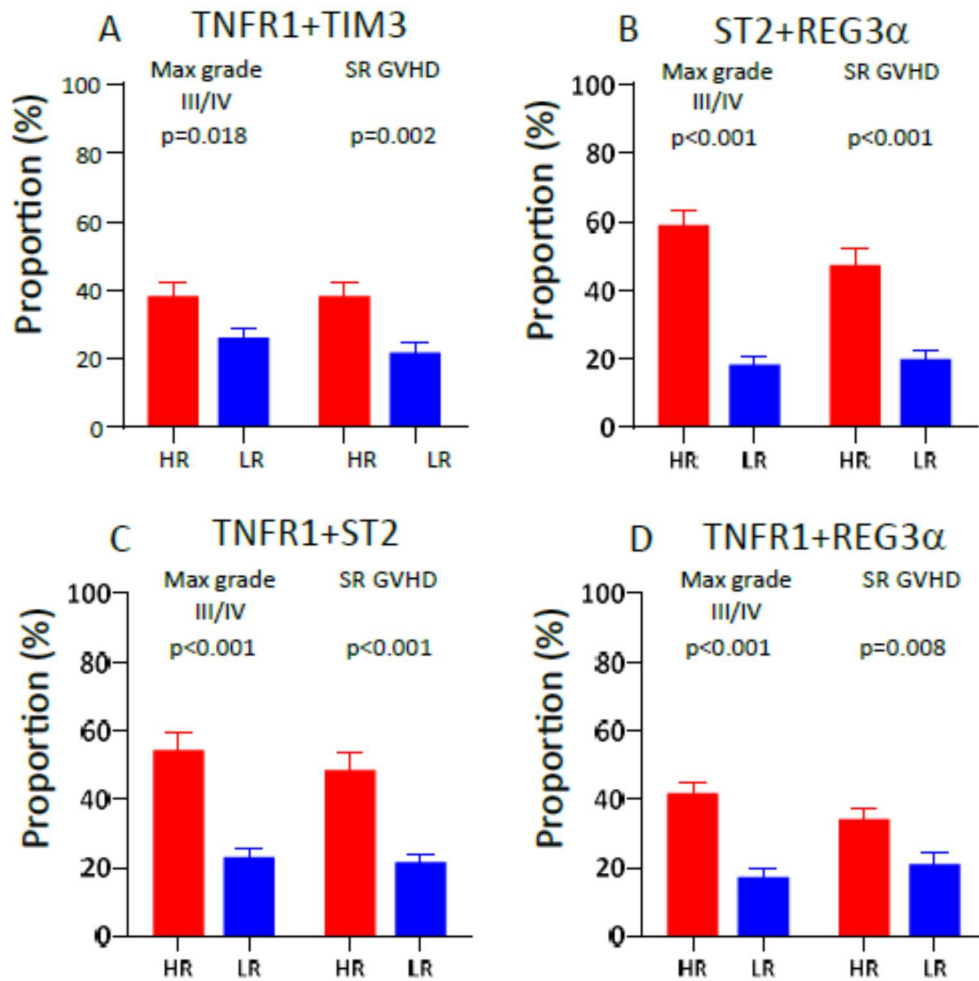

**Figure S2: GVHD outcomes in risk groups defined by two biomarker algorithms.** The proportion of patients with maximum grade III/IV GVHD for high risk patients (red) compared to low risk patients (blue) for each algorithm: (A) TNFR1+TIM3 (38% vs 26%,  $p=0.018$ ), (B) ST2+REG3 $\alpha$  (59% vs 18%,  $p<0.001$ ), (C) TNFR1+ST2 (54% vs 23%,  $P <0.001$ ), and (D) TNFR1+REG3 $\alpha$  (42% vs 17%,  $p <0.001$ ). The proportion of patients who developed steroid refractory GVHD for high risk patients compared to low risk patients for each algorithm was: (A) TNFR1+TIM3 (38% vs 22%,  $p=0.002$ ), (B) ST2+REG3 $\alpha$  (47% vs 20%,  $p<0.001$ ), (C) TNFR1+ST2 (48% vs 21%,  $p <0.001$ ), and (D) TNFR1+REG3 $\alpha$  (34% vs 21%,  $p=0.008$ ).

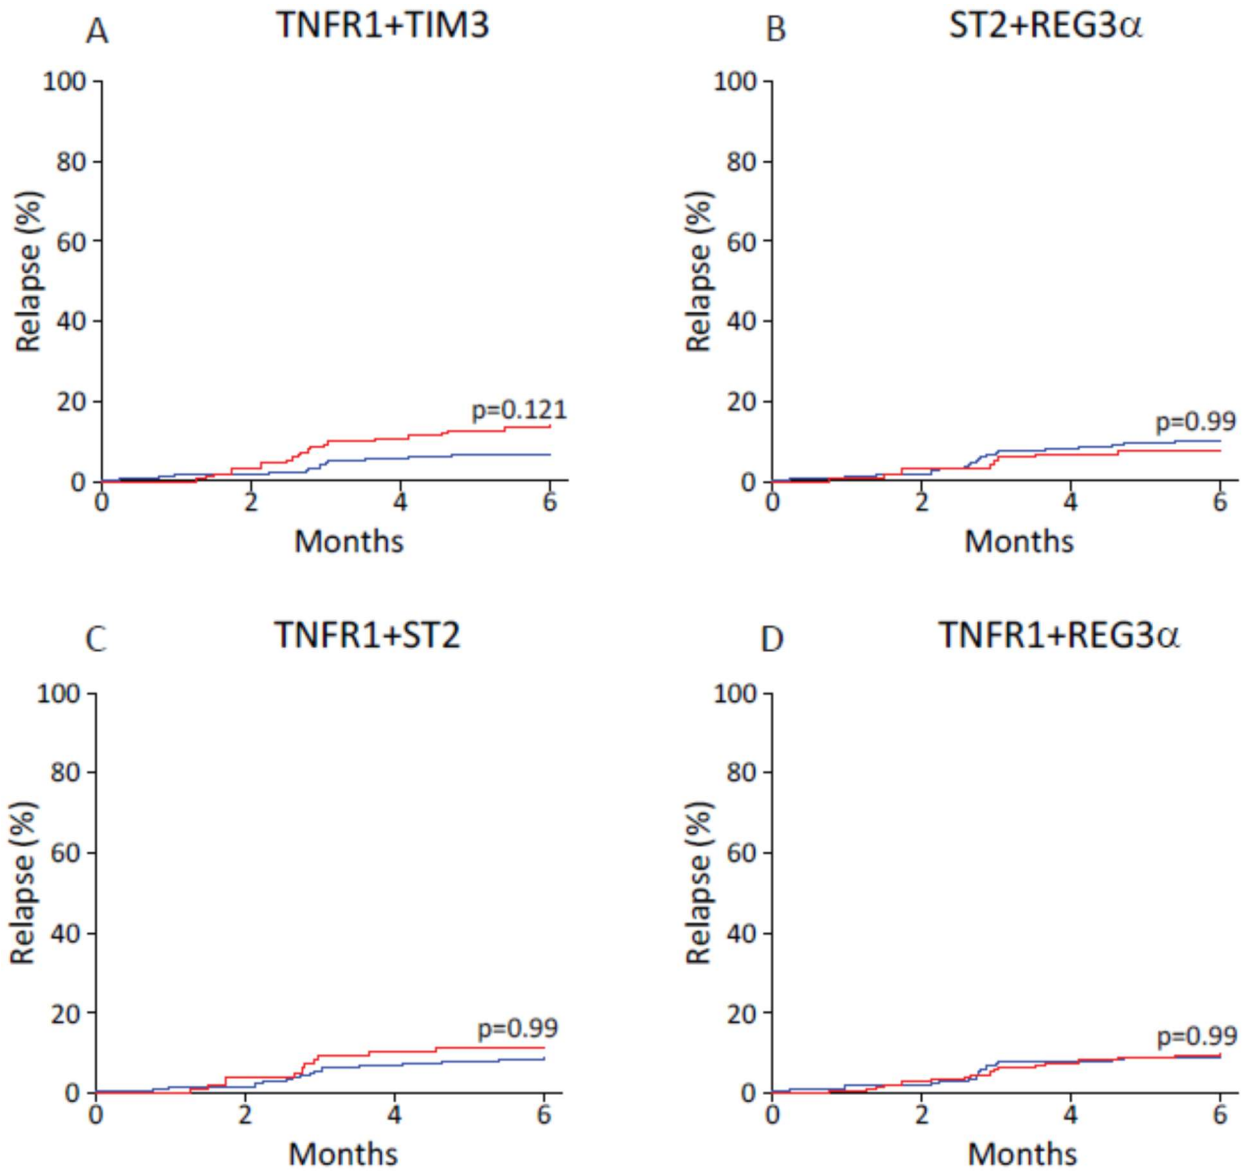

**Figure S3: Cumulative incidence of relapse in risk groups defined by two biomarker algorithms.** The cumulative incidence of relapse is shown for high (red) and low (blue) risk patients: (A) TNFR1+TIM3 (14% vs 7%,  $p=0.121$ ); (B) ST2+REG3α (8% vs 10%,  $p=0.99$ ); (C) TNFR1+ST2 (11% vs 9%,  $P=0.99$ ); and (D) TNFR1+REG3α (10% vs 9%,  $p=0.99$ ).



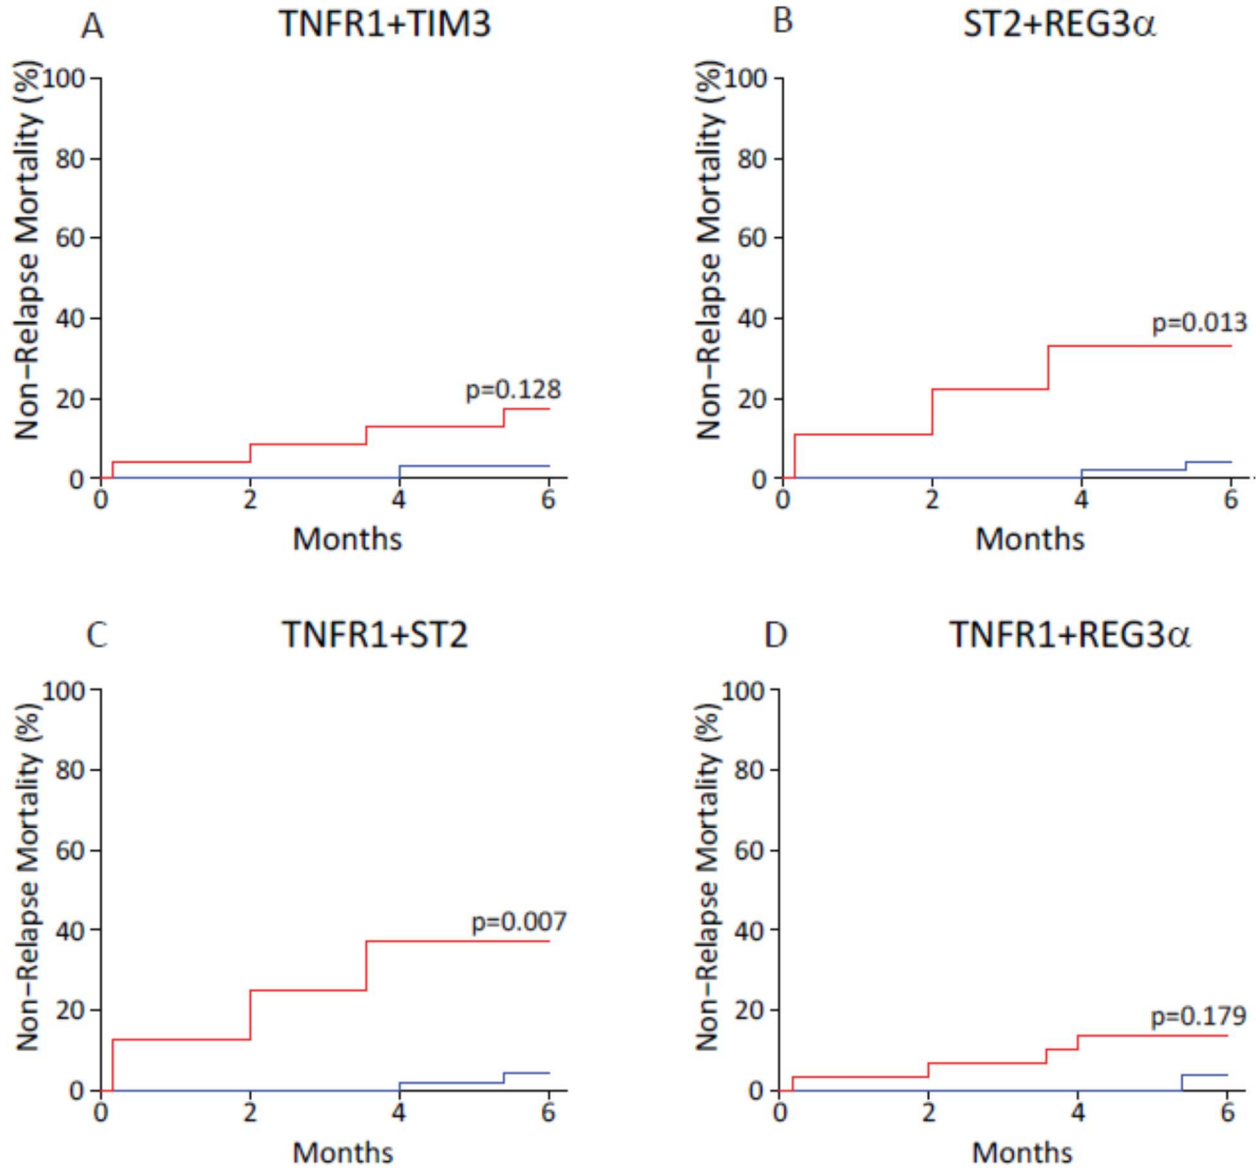

**Figure S4: 6 month NRM for risk groups defined by two biomarker algorithms in patients who received post-transplant cyclophosphamide as GVHD prophylaxis.** The cumulative incidence of 6 month NRM is shown for high (red) and low (blue) risk patients (A) TNFR1+TIM3 (17% vs 3%,  $p=0.128$ ); (B) ST2+REG3 $\alpha$  (33% vs 4%,  $p=0.013$ ); (C) TNFR1+ST2 (38% vs 4%,  $P=0.007$ ); and (D) TNFR1+REG3 $\alpha$  (14% vs 4%,  $p=0.179$ )
